# Supplementary material for: PHGDH inhibition overcomes dabrafenib resistance through metabolic rewiring in BRAF V600E anaplastic thyroid carcinoma
Source: Research Square preprint supplement (doi:10.21203/rs.3.rs-7069883/v1), 2025-07-14
Supplement: Supplementary file 1 [file 0baa2729d759a50765e3afa2.xlsx]

## Sheet: Sheet1
Supplementary Table 1. PHGDH−driven metabolic network
Pathway	Genes	Description
Serine biosynthesis pathway	PHGDH, PSAT1, PSPH, SLC1A4, SLC1A5, SLC38A1, SLC38A2	Converts 3-phosphoglycerate to serine, providing building blocks for cell growth and metabolism.
Folate/methionine/one-carbon metabolism	MTHFD1, MTHFD2, MTHFR, MTR, BHMT, MAT2A, CBS, TYMS	Supports nucleotide synthesis and methylation via folate and methionine cycles.
Nucleotide biosynthesis	TYMS, DHFR, RRM1, RRM2, CAD, UMPS, IMPDH1, GMPS	Generates purine and pyrimidine nucleotides essential for DNA/RNA synthesis.
Glutathione/redox balance	GCLC, GCLM, GSS, GSR, GPX1, GSTP1, SOD1, PRDX1, CAT	Maintains cellular redox homeostasis and protects against oxidative stress.
Transsulfuration pathway	CBS, CTH, SLC7A11, SLC3A2, GCLC, MAT1A, GNMT, AHCY	Converts homocysteine to cysteine, linking methionine cycle to antioxidant production.
p53/apoptosis pathway	TP53, MDM2, CDKN1A, BAX, CASP3, BID, APAF1, SESN1	Regulates cell cycle arrest and apoptosis in response to cellular stress or DNA damage.
