# Supplementary material for: PHGDH inhibition overcomes dabrafenib resistance through metabolic rewiring in BRAF V600E anaplastic thyroid carcinoma
Source: Research Square preprint supplement (doi:10.21203/rs.3.rs-7069883/v1), 2025-07-14
Supplement: Supplementary file 2 [file 3c723a9cecbb5d36037a5059.xlsx]

## Sheet: Supplementary Table 3
Supplementary Table 3. Gene set enrichment analysis: over-representation analysis
KEGG
ID	GeneRatio	pvalue	p.adjust
OXIDATIVE PHOSPHORYLATION [hsa00190]	40/1144	3.8e-07	0.00013
DIABETIC CARDIOMYOPATHY [hsa05415]	51/1144	1.9e-06	0.00027
HUNTINGTON DISEASE [hsa05016]	69/1144	2.8e-06	0.00027
PARKINSON DISEASE [hsa05012]	62/1144	3.2e-06	0.00027
THERMOGENESIS [hsa04714]	54/1144	1.2e-05	0.00082
ALZHEIMER DISEASE [hsa05010]	78/1144	4e-05	0.00231
ATP-DEPENDENT CHROMATIN REMODELING [hsa03082]	31/1144	5.4e-05	0.00264
BASAL TRANSCRIPTION FACTORS [hsa03022]	16/1144	6.4e-05	0.00276
PRION DISEASE [hsa05020]	58/1144	0.00011	0.00386
AMYOTROPHIC LATERAL SCLEROSIS [hsa05014]	73/1144	0.00011	0.00386
CHEMICAL CARCINOGENESIS - REACTIVE OXYGEN SPECIES [hsa05208]	47/1144	0.00058	0.01734
ENDOCYTOSIS [hsa04144]	51/1144	0.0006	0.01734
PATHWAYS OF NEURODEGENERATION - MULTIPLE DISEASES [hsa05022]	86/1144	0.00093	0.02469
NUCLEOTIDE EXCISION REPAIR [hsa03420]	17/1144	0.002	0.0499
MsigDB C3:TFT:GTRD
ID	GeneRatio	pvalue	p.adjust
ALKBH3_TARGET_GENES__C3:TFT:	86/2539	1e-10	2.6e-08
ELF5_TARGET_GENES__C3:TFT:	87/2539	3.4e-09	4.4e-07
TAFAZZIN_TARGET_GENES__C3:TFT:	87/2539	5.1e-09	4.4e-07
TASOR_TARGET_GENES__C3:TFT:	59/2539	1.7e-08	9.9e-07
ZNF101_TARGET_GENES__C3:TFT:	86/2539	1.9e-08	9.9e-07
RORA_TARGET_GENES__C3:TFT:	55/2539	2.3e-08	9.9e-07
ZZZ3_TARGET_GENES__C3:TFT:	62/2539	3.1e-08	1.1e-06
ATF5_TARGET_GENES__C3:TFT:	81/2539	4.8e-08	1.6e-06
ZBED4_TARGET_GENES__C3:TFT:	60/2539	6.7e-08	1.9e-06
HOXD11_TARGET_GENES__C3:TFT:	36/2539	1.6e-07	4.1e-06
DMRT1_TARGET_GENES__C3:TFT:	73/2539	1.9e-07	4.6e-06
PITX1_TARGET_GENES__C3:TFT:	64/2539	2.4e-07	5.3e-06
ZFP3_TARGET_GENES__C3:TFT:	65/2539	2.9e-07	5.7e-06
ZNF85_TARGET_GENES__C3:TFT:	60/2539	4.1e-07	7.7e-06
SETBP1_TARGET_GENES__C3:TFT:	42/2539	5.6e-07	9.7e-06
PGM3_TARGET_GENES__C3:TFT:	51/2539	1.1e-06	1.7e-05
RLF_TARGET_GENES__C3:TFT:	62/2539	1.4e-06	2.1e-05
ZNF558_TARGET_GENES__C3:TFT:	56/2539	2.7e-06	3.9e-05
DNMT1_TARGET_GENES__C3:TFT:	44/2539	7e-06	9.5e-05
MSX1_TARGET_GENES__C3:TFT:	39/2539	1.3e-05	0.00016
IRX2_TARGET_GENES__C3:TFT:	44/2539	1.4e-05	0.00016
ZNF490_TARGET_GENES__C3:TFT:	77/2539	1.4e-05	0.00016
HOXA10_TARGET_GENES__C3:TFT:	49/2539	1.4e-05	0.00016
CASP8AP2_TARGET_GENES__C3:TFT:	57/2539	2.2e-05	0.00023
ZNF547_TARGET_GENES__C3:TFT:	57/2539	3.3e-05	0.00034
ZNF667_TARGET_GENES__C3:TFT:	30/2539	4.3e-05	0.00043
LCORL_TARGET_GENES__C3:TFT:	70/2539	6.5e-05	0.0006
SMARCA1_TARGET_GENES__C3:TFT:	28/2539	6.5e-05	0.0006
NPM1_TARGET_GENES__C3:TFT:	57/2539	0.0001	0.00088
NR1I2_TARGET_GENES__C3:TFT:	55/2539	0.0001	0.00088
NR0B1_TARGET_GENES__C3:TFT:	59/2539	0.00011	0.00088
NFXL1_TARGET_GENES__C3:TFT:	70/2539	0.00012	0.00095
PSMB5_TARGET_GENES__C3:TFT:	50/2539	0.00013	0.0011
MYBL1_TARGET_GENES__C3:TFT:	71/2539	0.00014	0.0011
F10_TARGET_GENES__C3:TFT:	47/2539	0.00015	0.0011
PAX8_TARGET_GENES__C3:TFT:	20/2539	0.00017	0.0012
ZNF585B_TARGET_GENES__C3:TFT:	27/2539	0.00024	0.0017
ZNF830_TARGET_GENES__C3:TFT:	46/2539	0.00026	0.0018
EMX1_TARGET_GENES__C3:TFT:	39/2539	0.00027	0.0018
HDAC8_TARGET_GENES__C3:TFT:	31/2539	0.00028	0.0018
FOXO4_TARGET_GENES__C3:TFT:	58/2539	0.00029	0.0018
EPC1_TARGET_GENES__C3:TFT:	59/2539	0.0003	0.0018
HSF2_TARGET_GENES__C3:TFT:	41/2539	0.0003	0.0018
ZNF19_TARGET_GENES__C3:TFT:	2539-06-01	0.00068	0.004
ZNF581_TARGET_GENES__C3:TFT:	50/2539	0.00074	0.0043
NCOA6_TARGET_GENES__C3:TFT:	53/2539	0.00095	0.0053
ZNF236_TARGET_GENES__C3:TFT:	41/2539	0.001	0.0056
ZNF524_TARGET_GENES__C3:TFT:	52/2539	0.0011	0.0059
ZA_UNIPROT_Q9UM89_UNREVIEWED_GENES_TARGET_GENES__C3:TFT:	16/2539	0.0011	0.0059
MAML1_TARGET_GENES__C3:TFT:	48/2539	0.0012	0.006
PPARGC1A_TARGET_GENES__C3:TFT:	20/2539	0.0013	0.0065
ZNF595_TARGET_GENES__C3:TFT:	24/2539	0.0014	0.0068
BCL6B_TARGET_GENES__C3:TFT:	29/2539	0.0014	0.0071
DPPA3_TARGET_GENES__C3:TFT:	2539-08-01	0.0016	0.0076
PHF21A_TARGET_GENES__C3:TFT:	43/2539	0.0019	0.0088
NPAT_TARGET_GENES__C3:TFT:	42/2539	0.0019	0.0088
ZNF704_TARGET_GENES__C3:TFT:	15/2539	0.0023	0.011
MCM3_TARGET_GENES__C3:TFT:	35/2539	0.0024	0.011
ZNF669_TARGET_GENES__C3:TFT:	23/2539	0.0027	0.012
EBNA1BP2_TARGET_GENES__C3:TFT:	53/2539	0.0031	0.013
ZNF512B_TARGET_GENES__C3:TFT:	34/2539	0.0035	0.015
TSHZ1_TARGET_GENES__C3:TFT:	36/2539	0.0036	0.015
HEY2_TARGET_GENES__C3:TFT:	15/2539	0.0041	0.016
ZNF582_TARGET_GENES__C3:TFT:	15/2539	0.0041	0.016
ZNF354B_TARGET_GENES__C3:TFT:	32/2539	0.0042	0.017
ZNF584_TARGET_GENES__C3:TFT:	52/2539	0.0047	0.018
ZNF777_TARGET_GENES__C3:TFT:	14/2539	0.0047	0.018
WDHD1_TARGET_GENES__C3:TFT:	31/2539	0.0053	0.02
LMNB2_TARGET_GENES__C3:TFT:	2539-09-01	0.0065	0.024
CSHL1_TARGET_GENES__C3:TFT:	36/2539	0.0065	0.024
KLF14_TARGET_GENES__C3:TFT:	37/2539	0.0067	0.024
ZNF677_TARGET_GENES__C3:TFT:	28/2539	0.007	0.025
ZSCAN23_TARGET_GENES__C3:TFT:	16/2539	0.0072	0.025
ZNF746_TARGET_GENES__C3:TFT:	15/2539	0.0076	0.026
ZNF512_TARGET_GENES__C3:TFT:	58/2539	0.0079	0.027
ZNF623_TARGET_GENES__C3:TFT:	62/2539	0.0089	0.03
TOX4_TARGET_GENES__C3:TFT:	33/2539	0.0099	0.033
ALX4_TARGET_GENES__C3:TFT:	2539-08-01	0.01	0.034
TFCP2_TARGET_GENES__C3:TFT:	18/2539	0.01	0.034
ZNF202_TARGET_GENES__C3:TFT:	15/2539	0.011	0.034
HAND1_TARGET_GENES__C3:TFT:	62/2539	0.011	0.037
ZNF785_TARGET_GENES__C3:TFT:	13/2539	0.012	0.037
CHAMP1_TARGET_GENES__C3:TFT:	31/2539	0.012	0.037
SIPA1_TARGET_GENES__C3:TFT:	23/2539	0.012	0.037
PIAS4_TARGET_GENES__C3:TFT:	14/2539	0.013	0.038
ZNF157_TARGET_GENES__C3:TFT:	15/2539	0.013	0.04
ATM_TARGET_GENES__C3:TFT:	2539-05-01	0.014	0.04
ZNF34_TARGET_GENES__C3:TFT:	45/2539	0.014	0.042
PRDM12_TARGET_GENES__C3:TFT:	24/2539	0.015	0.043
ZSCAN18_TARGET_GENES__C3:TFT:	2539-10-01	0.015	0.043
NKX2_8_TARGET_GENES__C3:TFT:	2539-09-01	0.015	0.043
COBLL1_TARGET_GENES__C3:TFT:	23/2539	0.015	0.043
SS18_SSX1_FUSION_UNIPROT_Q8IZH1_UNREVIEWED_TARGET_GENES__C3:TFT:	53/2539	0.017	0.047
PHB2_TARGET_GENES__C3:TFT:	29/2539	0.019	0.052
RBM15_TARGET_GENES__C3:TFT:	28/2539	0.021	0.056
ZNF41_TARGET_GENES__C3:TFT:	33/2539	0.021	0.057
CHAF1A_TARGET_GENES__C3:TFT:	16/2539	0.021	0.057
SOX11_TARGET_GENES__C3:TFT:	2539-09-01	0.027	0.07
ZNF555_TARGET_GENES__C3:TFT:	24/2539	0.027	0.07
FOXQ1_TARGET_GENES__C3:TFT:	2539-08-01	0.027	0.07
RUVBL2_TARGET_GENES__C3:TFT:	2539-08-01	0.027	0.07
ZNF433_TARGET_GENES__C3:TFT:	2539-12-01	0.028	0.07
ZNF16_TARGET_GENES__C3:TFT:	13/2539	0.028	0.071
TBPL1_TARGET_GENES__C3:TFT:	30/2539	0.032	0.078
ZNF426_TARGET_GENES__C3:TFT:	30/2539	0.032	0.078
ZNF331_TARGET_GENES__C3:TFT:	46/2539	0.034	0.084
