# Supplementary material for: PHGDH inhibition overcomes dabrafenib resistance through metabolic rewiring in BRAF V600E anaplastic thyroid carcinoma
Source: Research Square preprint supplement (doi:10.21203/rs.3.rs-7069883/v1), 2025-07-14
Supplement: Supplementary file 3 [file bb1cf0fb0dd42066b9af2d9f.xlsx]

## Sheet: Supplementary Table 5
Supplementary Table 5. A collection of genes recognized as stemness markers (cancer stem cells)
Symbol	Entrez Id	Alias	Gene name
ABCG2	9429	ABC15 | ABCP | BCRP | BCRP1 | BMDP | CD338 | CDw338 | CDw388 | EST157481 | GOUT1 | MRX | MXR | MXR-1 | MXR1 | UAQTL1 | ABCG2	ATP binding cassette subfamily G member 2 (Junior blood group)
BMI1	648	FLVI2/BMI1 | PCGF4 | RNF51 | flvi-2/bmi-1 | BMI1	BMI1 proto-oncogene, polycomb ring finger
CD34	947	CD34	CD34 molecule
CD44	960	CDW44 | CSPG8 | ECM-III | ECMR-III | H-CAM | HCELL | HUTCH-1 | HUTCH-I | Hermes-1 | IN | LHR | MC56 | MDU2 | MDU3 | MIC4 | Pgp1 | CD44	CD44 molecule (Indian blood group)
CTNNB1	1499	CTNNB | EVR7 | MRD19 | NEDSDV | armadillo | CTNNB1	Catenin beta 1
EPAS1	2034	ECYT4 | HIF2A | HLF | MOP2 | PASD2 | bHLHe73 | EPAS1	Endothelial PAS domain protein 1
EZH2	2146	ENX-1 | ENX1 | EZH2b | KMT6 | KMT6A | WVS | WVS2 | EZH2	Enhancer of zeste 2 polycomb repressive complex 2 subunit
HIF1A	3091	HIF-1-alpha | HIF-1A | HIF-1alpha | HIF1 | HIF1-ALPHA | MOP1 | PASD8 | bHLHe78 | HIF1A	Hypoxia inducible factor 1 subunit alpha
KDM5B	10765	CT31 | JARID1B | MRT65 | PLU-1 | PLU1 | PPP1R98 | PUT1 | RBBP2H1A | RBP2-H1 | KDM5B	Lysine demethylase 5B
KLF4	9314	EZF | GKLF | KLF4	KLF transcription factor 4
LGR5	8549	FEX | GPR49 | GPR67 | GRP49 | HG38 | LGR5	Leucine rich repeat containing G protein-coupled receptor 5
MYC	4609	MRTL | MYCC | bHLHe39 | c-Myc | MYC	MYC proto-oncogene, bHLH transcription factor
NANOG	79923	NANOG	Nanog homeobox
NES	10763	Nbla00170 | NES	Nestin
NOTCH1	4851	AOS5 | AOVD1 | TAN1 | hN1 | NOTCH1	Notch receptor 1
POU5F1	5460	OCT3 | OCT4 | OTF-3 | OTF3 | OTF4 | Oct-3 | Oct-4 | Oct3/4 | POU5F1	POU class 5 homeobox 1
PROM1	8842	AC133 | CD133 | CORD12 | MCDR2 | MSTP061 | PROML1 | RP41 | STGD4 | PROM1	Prominin 1
SOX2	6657	ANOP3 | MCOPS3 | SOX2	SRY-box transcription factor 2
TWIST1	7291	ACS3 | BPES2 | BPES3 | CRS | CRS1 | CSO | SCS | SWCOS | TWIST | bHLHa38 | TWIST1	Twist family bHLH transcription factor 1
ZFP42	132625	REX-1 | REX1 | ZNF754 | zfp-42 | ZFP42	ZFP42 zinc finger protein
ZSCAN4	201516	ZNF494 | ZSCAN4	Zinc finger and SCAN domain containing 4
BMP4	652	BMP2B | BMP2B1 | MCOPS6 | OFC11 | ZYME | BMP4	Bone morphogenetic protein 4
KRT14	3861	CK14 | EBS1 | EBS1A | EBS1B | EBS1C | EBS1D | EBS3 | EBS4 | K14 | NFJ | KRT14	Keratin 14
PDGFRA	5156	CD140A | PDGFR-2 | PDGFR2 | PDGFRA	Platelet derived growth factor receptor alpha
PTCH1	5727	BCNS | BCNS1 | NBCCS | PTC | PTC1 | PTCH | PTCH1	Patched 1
TGFBR2	7048	AAT3 | FAA3 | LDS1B | LDS2 | LDS2B | MFS2 | RIIC | TAAD2 | TBR-ii | TBRII | TGFR-2 | TGFbeta-RII | tbetaR-II | TGFBR2	Transforming growth factor beta receptor 2
TNC	3371	150-225 | DFNA56 | GMEM | GP | HXB | JI | TN | TN-C | TNC	Tenascin C
ESRRB	2103	DFNB35 | ERR beta-2 | ERR2 | ERRb | ERRbeta2 | ESRL2 | NR3B2 | ESRRB	Estrogen related receptor beta
VEGFA	7422	L-VEGF | MVCD1 | VEGF | VPF | VEGFA	Vascular endothelial growth factor A
THY1	7070	CD90 | CDw90 | THY1	Thy-1 cell surface antigen
TET1	80312	CXXC6 | LCX | bA119F7.1 | TET1	Tet methylcytosine dioxygenase 1
TBX3	6926	TBX3-ISO | UMS | XHL | TBX3	T-box transcription factor 3
LRIG1	26018	LIG-1 | LIG1 | LRIG1	Leucine rich repeats and immunoglobulin like domains 1
A collection of genes recognized as stemness markers (extended)
Symbol	Entrezid	Alias	Genename
ABCG2	9429	ABC15 | ABCP | BCRP | BCRP1 | BMDP | CD338 | CDw338 | CDw388 | EST157481 | GOUT1 | MRX | MXR | MXR-1 | MXR1 | UAQTL1 | ABCG2	ATP binding cassette subfamily G member 2 (Junior blood group)
BMI1	648	FLVI2/BMI1 | PCGF4 | RNF51 | flvi-2/bmi-1 | BMI1	BMI1 proto-oncogene, polycomb ring finger
CD34	947	CD34	CD34 molecule
CD44	960	CDW44 | CSPG8 | ECM-III | ECMR-III | H-CAM | HCELL | HUTCH-1 | HUTCH-I | Hermes-1 | IN | LHR | MC56 | MDU2 | MDU3 | MIC4 | Pgp1 | CD44	CD44 molecule (Indian blood group)
CTNNB1	1499	CTNNB | EVR7 | MRD19 | NEDSDV | armadillo | CTNNB1	Catenin beta 1
EPAS1	2034	ECYT4 | HIF2A | HLF | MOP2 | PASD2 | bHLHe73 | EPAS1	Endothelial PAS domain protein 1
EZH2	2146	ENX-1 | ENX1 | EZH2b | KMT6 | KMT6A | WVS | WVS2 | EZH2	Enhancer of zeste 2 polycomb repressive complex 2 subunit
HIF1A	3091	HIF-1-alpha | HIF-1A | HIF-1alpha | HIF1 | HIF1-ALPHA | MOP1 | PASD8 | bHLHe78 | HIF1A	Hypoxia inducible factor 1 subunit alpha
KDM5B	10765	CT31 | JARID1B | MRT65 | PLU-1 | PLU1 | PPP1R98 | PUT1 | RBBP2H1A | RBP2-H1 | KDM5B	Lysine demethylase 5B
KLF4	9314	EZF | GKLF | KLF4	KLF transcription factor 4
LGR5	8549	FEX | GPR49 | GPR67 | GRP49 | HG38 | LGR5	Leucine rich repeat containing G protein-coupled receptor 5
MYC	4609	MRTL | MYCC | bHLHe39 | c-Myc | MYC	MYC proto-oncogene, bHLH transcription factor
NANOG	79923	NANOG	Nanog homeobox
NES	10763	Nbla00170 | NES	Nestin
NOTCH1	4851	AOS5 | AOVD1 | TAN1 | hN1 | NOTCH1	Notch receptor 1
POU5F1	5460	OCT3 | OCT4 | OTF-3 | OTF3 | OTF4 | Oct-3 | Oct-4 | Oct3/4 | POU5F1	POU class 5 homeobox 1
PROM1	8842	AC133 | CD133 | CORD12 | MCDR2 | MSTP061 | PROML1 | RP41 | STGD4 | PROM1	Prominin 1
SOX2	6657	ANOP3 | MCOPS3 | SOX2	SRY-box transcription factor 2
TWIST1	7291	ACS3 | BPES2 | BPES3 | CRS | CRS1 | CSO | SCS | SWCOS | TWIST | bHLHa38 | TWIST1	Twist family bHLH transcription factor 1
ZFP42	132625	REX-1 | REX1 | ZNF754 | zfp-42 | ZFP42	ZFP42 zinc finger protein
ZSCAN4	201516	ZNF494 | ZSCAN4	Zinc finger and SCAN domain containing 4
ABLIM1	3983	ABLIM | LIMAB1 | LIMATIN | abLIM-1 | ABLIM1	Actin binding LIM protein 1
ABR	29	MDB | ABR	ABR activator of RhoGEF and GTPase
ACVRL1	94	ACVRLK1 | ALK-1 | ALK1 | HHT | HHT2 | ORW2 | SKR3 | TSR-I | ACVRL1	Activin A receptor like type 1
ADGRE1	2015	EMR1 | TM7LN3 | ADGRE1	Adhesion G protein-coupled receptor E1
ADSS1	122622	ADSSL1 | MPD5 | ADSS1	Adenylosuccinate synthase 1
AP2A2	161	ADTAB | CLAPA2 | HIP-9 | HIP9 | HYPJ | AP2A2	Adaptor related protein complex 2 subunit alpha 2
ARG2	384	ARG2	Arginase 2
B4GALNT1	2583	GALGT | GALNACT | GalNAc-T | SPG26 | B4GALNT1	Beta-1,4-N-acetyl-galactosaminyltransferase 1
BIN1	274	AMPH2 | AMPHL | CNM2 | SH3P9 | BIN1	Bridging integrator 1
BMP1	649	OI13 | PCOLC | PCP | PCP2 | TLD | BMP1	Bone morphogenetic protein 1
CBX4	8535	NBP16 | PC2 | CBX4	Chromobox 4
CCL15	6359	HCC-2 | HMRP-2B | LKN-1 | LKN1 | MIP-1 delta | MIP-1D | MIP-5 | MRP-2B | NCC-3 | NCC3 | SCYA15 | SCYL3 | SY15 | CCL15	C-C motif chemokine ligand 15
CD47	961	IAP | MER6 | OA3 | CD47	CD47 molecule
CD53	963	MOX44 | TSPAN25 | CD53	CD53 molecule
CD68	968	GP110 | LAMP4 | SCARD1 | CD68	CD68 molecule
CEBPD	1052	C/EBP-delta | CELF | CRP3 | NF-IL6-beta | CEBPD	CCAAT enhancer binding protein delta
CLEC4A	50856	CD367 | CLECSF6 | DCIR | DDB27 | HDCGC13P | LLIR | hDCIR | CLEC4A	C-type lectin domain family 4 member A
CMA1	1215	CYH | MCT1 | chymase | CMA1	Chymase 1
COL11A2	1302	DFNA13 | DFNB53 | FBCG2 | HKE5 | OSMEDA | OSMEDB | PARP | STL3 | COL11A2	Collagen type XI alpha 2 chain
CORO1A	11151	CLABP | CLIPINA | HCORO1 | IMD8 | TACO | p57 | CORO1A	Coronin 1A
CSF1R	1436	BANDDOS | C-FMS | CD115 | CSF-1R | CSFR | FIM2 | FMS | GPSC | HDLS | HDLS1 | M-CSF-R | CSF1R	Colony stimulating factor 1 receptor
CTSB	1508	APPS | CPSB | KWE | RECEUP | CTSB	Cathepsin B
CTSS	1520	CTSS	Cathepsin S
CYFIP2	26999	DEE65 | EIEE65 | PIR121 | CYFIP2	Cytoplasmic FMR1 interacting protein 2
EFHD1	80303	MST133 | MSTP133 | PP3051 | SWS2 | EFHD1	EF-hand domain family member D1
EVI2A	2123	EVDA | EVI-2A | EVI2 | EVI2A	Ecotropic viral integration site 2A
EVL	51466	RNB6 | EVL	Enah/Vasp-like
GP1BB	2812	BDPLT1 | BS | CD42C | GPIBB | GPIbbeta | GP1BB	Glycoprotein Ib platelet subunit beta
GRIA2	2891	GLUR2 | GLURB | GluA2 | GluR-K2 | HBGR2 | NEDLIB | gluR-2 | gluR-B | GRIA2	Glutamate ionotropic receptor AMPA type subunit 2
GRINA	2907	HNRGW | LFG1 | NMDARA1 | TMBIM3 | GRINA	Glutamate ionotropic receptor NMDA type subunit associated protein 1
GSN	2934	ADF | AGEL | GSN	Gelsolin
GYPA	2993	CD235a | GPA | GPErik | GPSAT | HGpMiV | HGpMiXI | HGpSta(C) | MN | MNS | PAS-2 | GYPA	Glycophorin A (MNS blood group)
HBB	3043	CD113t-C | ECYT6 | beta-globin | HBB	Hemoglobin subunit beta
HDC	3067	HDC	Histidine decarboxylase
HSD11B1	3290	11-DH | 11-beta-HSD1 | CORTRD2 | HDL | HSD11 | HSD11B | HSD11L | SDR26C1 | HSD11B1	Hydroxysteroid 11-beta dehydrogenase 1
ITGB2	3689	CD18 | LAD | LCAMB | LFA-1 | MAC-1 | MF17 | MFI7 | ITGB2	Integrin subunit beta 2
KCNAB2	8514	AKR6A5 | HKvbeta2 | HKvbeta2.1 | HKvbeta2.2 | KCNA2B | KV-BETA-2 | KCNAB2	Potassium voltage-gated channel subfamily A regulatory beta subunit 2
LAT2	7462	HSPC046 | LAB | NTAL | WBSCR15 | WBSCR5 | WSCR5 | LAT2	Linker for activation of T cells family member 2
LILRB4	11006	B4 | CD85K | ILT-3 | ILT3 | LIR-5 | LIR5 | LILRB4	Leukocyte immunoglobulin like receptor B4
LY86	9450	MD-1 | MD1 | MMD-1 | dJ80N2.1 | LY86	Lymphocyte antigen 86
MAL	4118	MVP17 | VIP17 | MAL	Mal, T cell differentiation protein
MLLT11	10962	AF1Q | MLLT11	MLLT11 transcription factor 7 cofactor
MPEG1	219972	IMD77 | MPG1 | MPS1 | Mpg-1 | P-2 | MPEG1	Macrophage expressed 1
NCAM1	4684	CD56 | MSK39 | NCAM | NCAM1	Neural cell adhesion molecule 1
NHSL2	340527	NHSL2	NHS like 2
NIN	51199	SCKL7 | NIN	Ninein
NRP1	8829	BDCA4 | CD304 | NP1 | NRP | VEGF165R | NRP1	Neuropilin 1
PACSIN1	29993	SDPI | PACSIN1	Protein kinase C and casein kinase substrate in neurons 1
PAPSS2	9060	ATPSK2 | BCYM4 | SK2 | PAPSS2	3'-phosphoadenosine 5'-phosphosulfate synthase 2
PGLYRP1	8993	PGLYRP | PGRP | PGRP-S | PGRPS | TAG7 | TNFSF3L | PGLYRP1	Peptidoglycan recognition protein 1
PLD4	122618	C14orf175 | PLD4	Phospholipase D family member 4
PPP2R5A	5525	B56A | B56alpha | PR61A | PPP2R5A	Protein phosphatase 2 regulatory subunit B'alpha
PPP3CA	5530	ACCIID | CALN | CALNA | CALNA1 | CCN1 | CNA1 | DEE91 | IECEE | IECEE1 | PPP2B | PPP3CA	Protein phosphatase 3 catalytic subunit alpha
PRKCB	5579	PKC-beta | PKCB | PKCI(2) | PKCbeta | PRKCB1 | PRKCB2 | PRKCB	Protein kinase C beta
PTPRC	5788	B220 | CD45 | CD45R | GP180 | IMD105 | L-CA | LCA | LY5 | T200 | PTPRC	Protein tyrosine phosphatase receptor type C
RBMX	27316	HNRNPG | HNRPG | MRXS11 | RBMXP1 | RBMXRT | RNMX | hnRNP-G | RBMX	RNA binding motif protein X-linked
RELN	5649	ETL7 | LIS2 | PRO1598 | RL | RELN	Reelin
RFLNB	359845	CFM1 | FAM101B | RFLNB	Refilin B
RGS10	6001	RGS10	Regulator of G protein signaling 10
RGS14	10636	RGS14	Regulator of G protein signaling 14
RNASEK	440400	RNASEK	Ribonuclease K
RNF227	284023	LINC02581 | RNF227	Ring finger protein 227
ROGDI	79641	KTZS | RAV2 | ROGD1 | ROGDI	Rogdi atypical leucine zipper
RTN3	10313	ASYIP | HAP | NSPL2 | NSPLII | RTN3-A1 | RTN3	Reticulon 3
SIRPA	140885	BIT | CD172A | MFR | MYD-1 | P84 | PTPNS1 | SHPS1 | SIRP | SIRPA	Signal regulatory protein alpha
SLC11A1	6556	LSH | NRAMP | NRAMP1 | SLC11A1	Solute carrier family 11 member 1
SLC39A7	7922	AGM9 | D6S115E | D6S2244E | H2-KE4 | HKE4 | KE4 | RING5 | ZIP7 | SLC39A7	Solute carrier family 39 member 7
ST3GAL6	10402	SIAT10 | ST3GALVI | ST3GAL6	ST3 beta-galactoside alpha-2,3-sialyltransferase 6
STMN1	3925	C1orf215 | LAP18 | Lag | OP18 | PP17 | PP19 | PR22 | SMN | STMN1	Stathmin 1
TYROBP	7305	DAP12 | KARAP | PLOSL | PLOSL1 | TYROBP	Transmembrane immune signaling adaptor TYROBP
ZAP70	7535	ADMIO2 | IMD48 | SRK | STCD | STD | TZK | ZAP-70 | ZAP70	Zeta chain of T cell receptor associated protein kinase 70
ZDHHC14	79683	NEW1CP | ZDHHC14	Zinc finger DHHC-type palmitoyltransferase 14
ABCB1	5243	ABC20 | CD243 | CLCS | GP170 | MDR1 | P-GP | PGY1 | p-170 | ABCB1	ATP binding cassette subfamily B member 1
ACADM	34	ACAD1 | MCAD | MCADH | ACADM	Acyl-CoA dehydrogenase medium chain
ACAT2	39	ACAT2	Acetyl-CoA acetyltransferase 2
ADAM9	8754	CORD9 | MCMP | MDC9 | Mltng | ADAM9	ADAM metallopeptidase domain 9
ALDH7A1	501	ATQ1 | EPD | PDE | ALDH7A1	Aldehyde dehydrogenase 7 family member A1
ANKRD17	26057	CAGS | GTAR | MASK2 | NY-BR-16 | ANKRD17	Ankyrin repeat domain 17
ARCN1	372	COPD | SRMMD | SSMG | ARCN1	Archain 1
ARIH1	25820	ARI | HARI | HHARI | UBCH7BP | ARIH1	Ariadne RBR E3 ubiquitin protein ligase 1
BACH1	571	BACH-1 | BTBD24 | BACH1	BTB domain and CNC homolog 1
BLZF1	8548	GOLGIN-45 | JEM-1 | JEM-1s | JEM1 | BLZF1	Basic leucine zipper nuclear factor 1
BPNT2	54928	GPAPP | IMP 3 | IMP-3 | IMPA3 | IMPAD1 | BPNT2	3'(2'), 5'-bisphosphate nucleotidase 2
BYSL	705	BYSTIN | Enp1 | BYSL	Bystin like
CCND1	595	BCL1 | D11S287E | PRAD1 | U21B31 | CCND1	Cyclin D1
CDK2AP1	8099	DOC1 | DORC1 | ST19 | doc-1 | p12DOC-1 | CDK2AP1	Cyclin dependent kinase 2 associated protein 1
CDKN1A	1026	CAP20 | CDKN1 | CIP1 | MDA-6 | P21 | SDI1 | WAF1 | p21CIP1 | CDKN1A	Cyclin dependent kinase inhibitor 1A
CENPC	1060	CENP-C | CENPC1 | MIF2 | hcp-4 | CENPC	Centromere protein C
CHD1	1105	CHD-1 | PILBOS | CHD1	Chromodomain helicase DNA binding protein 1
COPRS	55352	C17orf79 | COPR5 | HSA272196 | TTP1 | COPRS	Coordinator of PRMT5 and differentiation stimulator
COPS4	51138	CSN4 | SGN4 | COPS4	COP9 signalosome subunit 4
COPS7A	50813	CSN7 | CSN7A | SGN7a | COPS7A	COP9 signalosome subunit 7A
CPXM1	56265	CPX1 | CPXM | CPXM1	Carboxypeptidase X, M14 family member 1
CRTAP	10491	CASP | LEPREL3 | OI7 | P3H5 | CRTAP	Cartilage associated protein
CTBP2	1488	CTBP2	C-terminal binding protein 2
CTTN	2017	EMS1 | CTTN	Cortactin
CWC22	57703	EIF4GL | NCM | fSAPb | CWC22	CWC22 spliceosome associated protein homolog
DCTPP1	79077	CDA03 | RS21C6 | XTP3TPA | DCTPP1	DCTP pyrophosphatase 1
DICER1	23405	DCR1 | Dicer | Dicer1e | GLOW | HERNA | K12H4.8-LIKE | MNG1 | RMSE2 | aviD | DICER1	Dicer 1, ribonuclease III
DNAJB6	10049	DJ4 | DnaJ | HHDJ1 | HSJ-2 | HSJ2 | LGMD1D | LGMD1E | LGMDD1 | MRJ | MSJ-1 | DNAJB6	DnaJ heat shock protein family (Hsp40) member B6
DPH5	51611	AD-018 | CGI-30 | HSPC143 | NEDSFF | NPD015 | DPH5	Diphthamide biosynthesis 5
DTYMK	1841	CDC8 | CONPM | PP3731 | TMPK | TYMK | DTYMK	Deoxythymidylate kinase
EIF3J	8669	EIF3S1 | eIF3-alpha | eIF3-p35 | EIF3J	Eukaryotic translation initiation factor 3 subunit J
EIF4EBP1	1978	4E-BP1 | 4EBP1 | BP-1 | PHAS-I | EIF4EBP1	Eukaryotic translation initiation factor 4E binding protein 1
EIF4G2	1982	AAG1 | DAP5 | NAT1 | P97 | EIF4G2	Eukaryotic translation initiation factor 4 gamma 2
ELOVL6	79071	FACE | FAE | LCE | hELO2 | ELOVL6	ELOVL fatty acid elongase 6
ELP2	55250	MRT58 | SHINC-2 | STATIP1 | StIP | ELP2	Elongator acetyltransferase complex subunit 2
EPRS1	2058	EARS | EPRS | GLUPRORS | HLD15 | PARS | PIG32 | QARS | QPRS | EPRS1	Glutamyl-prolyl-tRNA synthetase 1
ERCC5	2073	COFS3 | ERCC5-201 | ERCM2 | UVDR | XPG | XPGC | ERCC5	ERCC excision repair 5, endonuclease
ESF1	51575	ABTAP | C20orf6 | HDCMC28P | bA526K24.1 | ESF1	ESF1 nucleolar pre-rRNA processing protein homolog
F2R	2149	CF2R | HTR | PAR-1 | PAR1 | TR | F2R	Coagulation factor II thrombin receptor
FASTKD5	60493	dJ1187M17.5 | FASTKD5	FAST kinase domains 5
FBXO38	81545	Fbx38 | HMN2D | MOKA | SP329 | FBXO38	F-box protein 38
FBXO8	26269	DC10 | FBS | FBX8 | FBXO8	F-box protein 8
FCF1	51077	Bka | C14orf111 | CGI-35 | UTP24 | FCF1	FCF1 rRNA-processing protein
FHL1	2273	FCMSU | FHL-1 | FHL1A | FHL1B | FLH1A | KYOT | RBMX1A | RBMX1B | SLIM | SLIM-1 | SLIM1 | SLIMMER | XMPMA | FHL1	Four and a half LIM domains 1
FKBP11	51303	FKBP19 | FKBP11	FKBP prolyl isomerase 11
FKBP9	11328	FKBP60 | FKBP63 | PPIase | FKBP9	FKBP prolyl isomerase 9
GAB1	2549	DFNB26 | GAB1	GRB2 associated binding protein 1
GARS1	2617	CMT2D | DSMAV | GARS | GlyRS | HMN5 | HMN5A | SMAD1 | SMAJI | GARS1	Glycyl-tRNA synthetase 1
GAS2	2620	GAS-2 | GAS2	Growth arrest specific 2
GCAT	23464	KBL | GCAT	Glycine C-acetyltransferase
GCLM	2730	GLCLR | GCLM	Glutamate-cysteine ligase modifier subunit
GCSH	2653	GCE | MMDS7 | NKH | GCSH	Glycine cleavage system protein H
GFER	2671	ALR | ERV1 | HERV1 | HPO | HPO1 | HPO2 | HSS | MMCHD | MPMCD | GFER	Growth factor, augmenter of liver regeneration
GHR	2690	GHBP | GHIP | GHR	Growth hormone receptor
GLO1	2739	GLOD1 | GLYI | HEL-S-74 | GLO1	Glyoxalase I
GNB1	2782	HG2A | MDS | MRD42 | GNB1	G protein subunit beta 1
GNL2	29889	HUMAUANTIG | NGP1 | Ngp-1 | Nog2 | Nug2 | GNL2	G protein nucleolar 2
GRWD1	83743	CDW4 | GRWD | RRB1 | WDR28 | GRWD1	Glutamate rich WD repeat containing 1
IARS1	3376	GRIDHH | IARS | ILERS | ILRS | IRS | PRO0785 | IARS1	Isoleucyl-tRNA synthetase 1
IARS2	55699	CAGSSS | ILERS | IARS2	Isoleucyl-tRNA synthetase 2, mitochondrial
INTS5	80789	INT5 | KIAA1698 | INTS5	Integrator complex subunit 5
ITGA6	3655	CD49f | ITGA6A | ITGA6B | JEB6 | VLA-6 | ITGA6	Integrin subunit alpha 6
ITGB1	3688	CD29 | FNRB | GPIIA | MDF2 | MSK12 | VLA-BETA | VLAB | ITGB1	Integrin subunit beta 1
JAGN1	84522	GL009 | SCN6 | JAGN1	Jagunal homolog 1
KANK3	256949	ANKRD47 | KANK3	KN motif and ankyrin repeat domains 3
KCNAB3	9196	AKR6A9 | KCNA3.1B | KCNA3B | KV-BETA-3 | KCNAB3	Potassium voltage-gated channel subfamily A regulatory beta subunit 3
KIF2A	3796	CDCBM3 | HK2 | KIF2 | KIF2A	Kinesin family member 2A
KRAS	3845	C-K-RAS | C-K-RAS | CFC2 | K-RAS2A | K-RAS2B | K-RAS4A | K-RAS4B | K-Ras | K-Ras 2 | KI-RAS | KRAS1 | KRAS2 | NS | NS3 | OES | RALD | RASK2 | c-Ki-ras | c-Ki-ras2 | KRAS	KRAS proto-oncogene, GTPase
LAPTM4A	9741	HUMORF13 | LAPTM4 | MBNT | Mtrp | LAPTM4A	Lysosomal protein transmembrane 4 alpha
LAPTM4B	55353	LAPTM4beta | LC27 | LAPTM4B	Lysosomal protein transmembrane 4 beta
LAS1L	81887	Las1 | Las1-like | MRXSWTS | WTS | dJ475B7.2 | LAS1L	LAS1 like ribosome biogenesis factor
LIG3	3980	LIG2 | LIG3alpha | MTDPS20 | LIG3	DNA ligase 3
LIMA1	51474	EPLIN | LDLCQ8 | SREBP3 | LIMA1	LIM domain and actin binding 1
LRRC58	116064	LRRC58	Leucine rich repeat containing 58
LSG1	55341	LSG1	Large 60S subunit nuclear export GTPase 1
LSM2	57819	C6orf28 | G7B | YBL026W | snRNP | LSM2	LSM2 homolog, U6 small nuclear RNA and mRNA degradation associated
MAP4K3	8491	GLK | MAPKKKK3 | MEKKK 3 | MEKKK3 | RAB8IPL1 | MAP4K3	Mitogen-activated protein kinase kinase kinase kinase 3
MARCHF7	64844	AXO | AXOT | MARCH-VII | MARCH7 | RNF177 | MARCHF7	Membrane associated ring-CH-type finger 7
MDFI	4188	I-MF | I-mfa | MDFI	MyoD family inhibitor
MDFIC	29969	HIC | LMPHM12 | MDFIC1 | MDFIC	MyoD family inhibitor domain containing
MED23	9439	ARC130 | CRSP130 | CRSP133 | CRSP3 | DRIP130 | MRT18 | SUR-2 | SUR2 | MED23	Mediator complex subunit 23
MPDU1	9526	CDGIF | HBEBP2BPA | Lec35 | My008 | PP3958 | PQLC5 | SL15 | SLC66A5 | MPDU1	Mannose-P-dolichol utilization defect 1
MPHOSPH10	10199	CT90 | MPP10 | MPP10P | PPP1R106 | MPHOSPH10	M-phase phosphoprotein 10
MRPL17	63875	L17mt | LIP2 | MRP-L17 | MRP-L26 | RPL17L | RPML26 | bL17m | MRPL17	Mitochondrial ribosomal protein L17
MRPL34	64981	L34mt | bL34m | MRPL34	Mitochondrial ribosomal protein L34
MRPL45	84311	L45mt | MRP-L45 | Mba1 | mL45 | MRPL45	Mitochondrial ribosomal protein L45
MRPS10	55173	MRP-S10 | PNAS-122 | uS10m | MRPS10	Mitochondrial ribosomal protein S10
MRPS2	51116	CGI-91 | COXPD36 | MRP-S2 | S2mt | uS2m | MRPS2	Mitochondrial ribosomal protein S2
MRPS31	10240	IMOGN38 | MRP-S31 | S31mt | mS31 | MRPS31	Mitochondrial ribosomal protein S31
MSH5	4439	G7 | MUTSH5 | NG23 | POF13 | SPGF74 | MSH5	MutS homolog 5
MTERF3	51001	CGI-12 | MTERFD1 | MTERF3	Mitochondrial transcription termination factor 3
MTMR10	54893	MTMR10	Myotubularin related protein 10
NDUFAF4	29078	C6orf66 | HRPAP20 | HSPC125 | MC1DN15 | My013 | bA22L21.1 | NDUFAF4	NADH:ubiquinone oxidoreductase complex assembly factor 4
NIFK	84365	MKI67IP | Nopp34 | NIFK	Nucleolar protein interacting with the FHA domain of MKI67
NOP58	51602	HSPC120 | NOP5 | NOP5/NOP58 | NOP58	NOP58 ribonucleoprotein
NOPCHAP1	121053	C12orf45 | DDSR1 | NOPCHAP1	NOP protein chaperone 1
NUP35	129401	MP-44 | MP44 | NP44 | NUP53 | NUP35	Nucleoporin 35
PACRGL	133015	C4orf28 | PACRGL	Parkin coregulated like
PAFAH2	5051	HSD-PLA2 | PAFAH2	Platelet activating factor acetylhydrolase 2
PCF11	51585	PCF11	PCF11 cleavage and polyadenylation factor subunit
PDCD2	5134	RP8 | ZMYND7 | PDCD2	Programmed cell death 2
PEX7	5191	PBD9B | PTS2R | RCDP1 | RD | PEX7	Peroxisomal biogenesis factor 7
PHTF2	57157	PHTF2	Putative homeodomain transcription factor 2
PIGX	54965	PIG-X | PIGX	Phosphatidylinositol glycan anchor biosynthesis class X
PKD2	5311	APKD2 | PC2 | PKD4 | Pc-2 | TRPP2 | PKD2	Polycystin 2, transient receptor potential cation channel
PLA2G6	8398	CaI-PLA2 | GVI | INAD1 | IPLA2-VIA | NBIA2 | NBIA2A | NBIA2B | PARK14 | PLA2 | PNPLA9 | iPLA2 | iPLA2beta | PLA2G6	Phospholipase A2 group VI
PLS3	5358	BMND18 | T-plastin | PLS3	Plastin 3
PPA1	5464	HEL-S-66p | IOPPP | PP | PP1 | SID6-8061 | PPA1	Inorganic pyrophosphatase 1
PPIC	5480	CYPC | PPIC	Peptidylprolyl isomerase C
PPP1R2	5504	IPP-2 | IPP2 | PPP1R2A | PPP1R2	Protein phosphatase 1 regulatory inhibitor subunit 2
PPP2R1B	5519	PP2A-Abeta | PR65B | PPP2R1B	Protein phosphatase 2 scaffold subunit Abeta
PRPF6	24148	ANT-1 | ANT1 | C20orf14 | Prp6 | RP60 | SNRNP102 | TOM | U5-102K | hPrp6 | PRPF6	Pre-mRNA processing factor 6
PRPSAP1	5635	PAP39 | PRPSAP1	Phosphoribosyl pyrophosphate synthetase associated protein 1
PSMD11	5717	Rpn6 | S9 | p44.5 | PSMD11	Proteasome 26S subunit, non-ATPase 11
PSMD12	5718	Rpn5 | STISS | p55 | PSMD12	Proteasome 26S subunit, non-ATPase 12
PTPN2	5771	PTN2 | PTPT | TC-PTP | TC45 | TC48 | TCELLPTP | TCPTP | PTPN2	Protein tyrosine phosphatase non-receptor type 2
RAB18	22931	RAB18LI1 | WARBM3 | RAB18	RAB18, member RAS oncogene family
RABGGTB	5876	GGTB | RABGGTB	Rab geranylgeranyltransferase subunit beta
RAD23B	5887	HHR23B | HR23B | P58 | RAD23B	RAD23 homolog B, nucleotide excision repair protein
RARS2	57038	ArgRS | DALRD2 | PCH6 | PRO1992 | RARSL | RARS2	Arginyl-tRNA synthetase 2, mitochondrial
RASA1	5921	CM-AVM | CMAVM | CMAVM1 | GAP | PKWS | RASA | RASGAP | p120 | p120GAP | p120RASGAP | RASA1	RAS p21 protein activator 1
RCL1	10171	RNAC | RPCL1 | RCL1	RNA terminal phosphate cyclase like 1
RCN1	5954	HEL-S-84 | PIG20 | RCAL | RCN | RCN1	Reticulocalbin 1
RIDA	10247	HRSP12 | P14.5 | PSP | UK114 | hp14.5 | RIDA	Reactive intermediate imine deaminase A homolog
RIMOC1	285636	C5orf51 | RIMOC1	RAB7A interacting MON1-CCZ1 complex subunit 1
RNF138	51444	HSD-4 | NARF | STRIN | hNARF | RNF138	Ring finger protein 138
RNF145	153830	RNF145	Ring finger protein 145
RNF4	6047	RES4-26 | SLX5 | SNURF | RNF4	Ring finger protein 4
RNFT1	51136	PTD016 | RNFT1	Ring finger protein, transmembrane 1
ROCK2	9475	ROCK-II | ROCK2	Rho associated coiled-coil containing protein kinase 2
RPL22	6146	EAP | HBP15 | HBP15/L22 | L22 | eL22 | RPL22	Ribosomal protein L22
RPP14	11102	P14 | RPP14	Ribonuclease P/MRP subunit p14
RPUSD4	84881	RPUSD4	RNA pseudouridine synthase D4
RRN3	54700	A-270G1.2 | TIFIA | RRN3	RRN3 homolog, RNA polymerase I transcription factor
RSL1D1	26156	CSIG | L12 | PBK1 | UTP30 | RSL1D1	Ribosomal L1 domain containing 1
RSRC2	65117	RSRC2	Arginine and serine rich coiled-coil 2
RYK	6259	D3S3195 | JTK5 | JTK5A | RYK1 | RYK	Receptor like tyrosine kinase
SEC23A	10484	CLSD | hSec23A | SEC23A	SEC23 homolog A, COPII coat complex component
SEC23IP	11196	MSTP053 | P125 | P125A | iPLA1A | iPLA1beta | SEC23IP	SEC23 interacting protein
SH3D19	152503	EBP | EVE1 | Eve-1 | Kryn | SH3P19 | SH3D19	SH3 domain containing 19
SLC38A2	54407	ATA2 | PRO1068 | SAT2 | SNAT2 | SLC38A2	Solute carrier family 38 member 2
SLC4A7	9497	NBC2 | NBC3 | NBCN1 | SBC2 | SLC4A6 | SLC4A7	Solute carrier family 4 member 7
SLC7A6	9057	LAT-2 | LAT3 | y+LAT-2 | SLC7A6	Solute carrier family 7 member 6
SMAD1	4086	BSP-1 | BSP1 | JV4-1 | JV41 | MADH1 | MADR1 | SMAD1	SMAD family member 1
SMAD2	4087	CHTD8 | JV18 | JV18-1 | LDS6 | MADH2 | MADR2 | hMAD-2 | hSMAD2 | SMAD2	SMAD family member 2
SMARCAD1	56916	ADERM | BASNS | ETL1 | HEL1 | HRZ | TYS | SMARCAD1	SWI/SNF-related, matrix-associated actin-dependent regulator of chromatin, subfamily a, containing DEAD/H box 1
SNRPC	6631	U1C | Yhc1 | SNRPC	Small nuclear ribonucleoprotein polypeptide C
SNX12	29934	SNX12	Sorting nexin 12
SOCS2	8835	CIS2 | Cish2 | SOCS-2 | SSI-2 | SSI2 | STATI2 | SOCS2	Suppressor of cytokine signaling 2
SRSF3	6428	SFRS3 | SRp20 | SRSF3	Serine and arginine rich splicing factor 3
SRSF6	6431	B52 | HEL-S-91 | SFRS6 | SRP55 | SRSF6	Serine and arginine rich splicing factor 6
STAM	8027	STAM-1 | STAM1 | STAM	Signal transducing adaptor molecule
STXBP3	6814	MUNC18-3 | MUNC18C | PSP | UNC-18C | STXBP3	Syntaxin binding protein 3
SUCLG2	8801	G-SCS | GBETA | GTPSCS | SUCLG2	Succinate-CoA ligase GDP-forming subunit beta
TARS2	80222	COXPD21 | TARSL1 | thrRS | TARS2	Threonyl-tRNA synthetase 2, mitochondrial
TBC1D15	64786	RAB7-GAP | TBC1D15	TBC1 domain family member 15
TBRG1	84897	NIAM | TB-5 | TBRG1	Transforming growth factor beta regulator 1
TBRG4	9238	CPR2 | FASTKD4 | TBRG4	Transforming growth factor beta regulator 4
TCEAL9	51186	WBP5 | WEX6 | TCEAL9	Transcription elongation factor A like 9
TEAD2	8463	ETF | TEAD-2 | TEF-4 | TEF4 | TEAD2	TEA domain transcription factor 2
TGIF2	60436	TGIF2	TGFB induced factor homeobox 2
TGS1	96764	NCOA6IP | PIMT | PIPMT | TGS1	Trimethylguanosine synthase 1
TJP1	7082	ZO-1 | TJP1	Tight junction protein 1
TMEM183A	92703	C1orf37 | TMEM183A	Transmembrane protein 183A
TOM1L1	10040	SRCASM | TOM1L1	Target of myb1 like 1 membrane trafficking protein
TRIP6	7205	OIP-1 | OIP1 | TRIP-6 | TRIP6i2 | ZRP-1 | TRIP6	Thyroid hormone receptor interactor 6
TXNDC9	10190	APACD | PHLP3 | TXNDC9	Thioredoxin domain containing 9
TXNRD1	7296	GRIM-12 | TR | TR1 | TRXR1 | TXNR | TXNR1 | TXNRD1	Thioredoxin reductase 1
UBE2T	29089	FANCT | HSPC150 | PIG50 | UBE2T	Ubiquitin conjugating enzyme E2 T
UMPS	7372	OPRT | UMPS	Uridine monophosphate synthetase
UPP1	7378	UDRPASE | UP | UPASE | UPP | UPP1	Uridine phosphorylase 1
URI1	8725	C19orf2 | NNX3 | PPP1R19 | RMP | URI | URI1	URI1 prefoldin like chaperone
USP10	9100	UBPO | USP10	Ubiquitin specific peptidase 10
USP9X	8239	DFFRX | FAF | FAM | MRX99 | MRXS99F | XLID99 | hFAM | USP9X	Ubiquitin specific peptidase 9 X-linked
UTP20	27340	1A6/DRIM | DRIM | UTP20	UTP20 small subunit processome component
UTP4	84916	CIRH1A | CIRHIN | NAIC | TEX292 | UTP4	UTP4 small subunit processome component
WDR43	23160	NET12 | UTP5 | WDR43	WD repeat domain 43
WDR55	54853	WDR55	WD repeat domain 55
XPO1	7514	CRM-1 | CRM1 | emb | exp1 | XPO1	Exportin 1
XPOT	11260	XPO3 | XPOT	Exportin for tRNA
XRCC5	7520	KARP-1 | KARP1 | KU80 | KUB2 | Ku86 | NFIV | XRCC5	X-ray repair cross complementing 5
YAP1	10413	COB1 | YAP | YAP-1 | YAP2 | YAP65 | YKI | YAP1	Yes1 associated transcriptional regulator
YES1	7525	HsT441 | P61-YES | Yes | c-yes | YES1	YES proto-oncogene 1, Src family tyrosine kinase
YWHAB	7529	GW128 | HEL-S-1 | HS1 | KCIP-1 | YWHAA | YWHAB	Tyrosine 3-monooxygenase/tryptophan 5-monooxygenase activation protein beta
YWHAH	7533	YWHA1 | YWHAH	Tyrosine 3-monooxygenase/tryptophan 5-monooxygenase activation protein eta
ZC3H14	79882	MRT56 | MSUT-2 | NY-REN-37 | SUT2 | UKp68 | ZC3H14	Zinc finger CCCH-type containing 14
ZCCHC10	54819	ZCCHC10	Zinc finger CCHC-type containing 10
ZFX	7543	ZNF926 | ZFX	Zinc finger protein X-linked
ZMAT3	64393	PAG608 | WIG-1 | WIG1 | ZMAT3	Zinc finger matrin-type 3
ZMYM4	9202	CDIR | MYM | ZNF198L3 | ZNF262 | ZMYM4	Zinc finger MYM-type containing 4
ZNF213	7760	CR53 | ZKSCAN21 | ZSCAN53 | ZNF213	Zinc finger protein 213
ZNF281	23528	GZP1 | ZBP-99 | ZBP99 | ZNP-99 | ZNF281	Zinc finger protein 281
ZNF639	51193	ANC-2H01 | ANC_2H01 | ZASC1 | ZNF639	Zinc finger protein 639
ZNF644	84146	BM-005 | MYP21 | NatF | ZEP-2 | ZNF644	Zinc finger protein 644
ZNF708	7562	KOX8 | ZNF15 | ZNF15L1 | ZNF708	Zinc finger protein 708
ZZZ3	26009	ATAC1 | ZZZ3	Zinc finger ZZ-type containing 3
BMP4	652	BMP2B | BMP2B1 | MCOPS6 | OFC11 | ZYME | BMP4	Bone morphogenetic protein 4
KRT14	3861	CK14 | EBS1 | EBS1A | EBS1B | EBS1C | EBS1D | EBS3 | EBS4 | K14 | NFJ | KRT14	Keratin 14
PDGFRA	5156	CD140A | PDGFR-2 | PDGFR2 | PDGFRA	Platelet derived growth factor receptor alpha
PTCH1	5727	BCNS | BCNS1 | NBCCS | PTC | PTC1 | PTCH | PTCH1	Patched 1
TGFBR2	7048	AAT3 | FAA3 | LDS1B | LDS2 | LDS2B | MFS2 | RIIC | TAAD2 | TBR-ii | TBRII | TGFR-2 | TGFbeta-RII | tbetaR-II | TGFBR2	Transforming growth factor beta receptor 2
TNC	3371	150-225 | DFNA56 | GMEM | GP | HXB | JI | TN | TN-C | TNC	Tenascin C
ESRRB	2103	DFNB35 | ERR beta-2 | ERR2 | ERRb | ERRbeta2 | ESRL2 | NR3B2 | ESRRB	Estrogen related receptor beta
VEGFA	7422	L-VEGF | MVCD1 | VEGF | VPF | VEGFA	Vascular endothelial growth factor A
THY1	7070	CD90 | CDw90 | THY1	Thy-1 cell surface antigen
TET1	80312	CXXC6 | LCX | bA119F7.1 | TET1	Tet methylcytosine dioxygenase 1
TBX3	6926	TBX3-ISO | UMS | XHL | TBX3	T-box transcription factor 3
LRIG1	26018	LIG-1 | LIG1 | LRIG1	Leucine rich repeats and immunoglobulin like domains 1
