# Supplementary material for: PHGDH inhibition overcomes dabrafenib resistance through metabolic rewiring in BRAF V600E anaplastic thyroid carcinoma
Source: Research Square preprint supplement (doi:10.21203/rs.3.rs-7069883/v1), 2025-07-14
Supplement: Supplementary file 4 [file d8a71ffa2797419d20e248f3.xlsx]

## Sheet: Sheet1
Supplementary Table 4. Gene set enrichment analysis: over-representation analysis of DElncRNA (FDR 0.05, KEGG_2021_Human_lncRNA)
ID	GeneRatio	pvalue	p.adjust
Mismatch repair	2025-01-04	0.023	0.12
RNA polymerase	2025-01-04	0.031	0.12
DNA replication	2025-01-04	0.036	0.12
Homologous recombination	2025-01-04	0.041	0.12
Nucleotide excision repair	2025-01-04	0.047	0.12
Fanconi anemia pathway	2025-01-04	0.054	0.12
Aminoacyl-tRNA biosynthesis	2025-01-04	0.066	0.12
Arrhythmogenic right ventricular cardiomyopathy	2025-01-04	0.076	0.12
RNA degradation	2025-01-04	0.078	0.12
Hypertrophic cardiomyopathy	2025-01-04	0.089	0.12
Dilated cardiomyopathy	2025-01-04	0.095	0.12
mRNA surveillance pathway	2025-01-04	0.097	0.12
Glucagon signaling pathway	2025-01-04	0.105	0.12
Ribosome biogenesis in eukaryotes	2025-01-04	0.106	0.12
Adrenergic signaling in cardiomyocytes	2025-01-04	0.118	0.12
Amyotrophic lateral sclerosis	2025-01-04	0.118	0.12
Cell cycle	2025-01-04	0.118	0.12
Herpes simplex virus 1 infection	2025-01-04	0.118	0.12
Huntington disease	2025-01-04	0.118	0.12
Insulin signaling pathway	2025-01-04	0.118	0.12
Parkinson disease	2025-01-04	0.118	0.12
Ribosome	2025-01-04	0.118	0.12
RNA transport	2025-01-04	0.118	0.12
Spliceosome	2025-01-04	0.118	0.12
