# Supplementary material for: PHGDH inhibition overcomes dabrafenib resistance through metabolic rewiring in BRAF V600E anaplastic thyroid carcinoma
Source: Research Square preprint supplement (doi:10.21203/rs.3.rs-7069883/v1), 2025-07-14
Supplement: Supplementary file 5 [file f39f8982be9dc696c8c035c4.xlsx]

## Sheet: Sheet1
Supplementary Table 2. PHGDH−driven metabolic network: . GSEA Enrichment Scores
R vs C
ID	Set Size	NES	p.adjust
Glutathione_redox_balance	29	1.6	0.068
Nucleotide_biosynthesis	21	-1.53	0.068
Transsulfuration_pathway	12	1.48	0.074
Serine_biosynthesis_pathway	14	1.46	0.074
Folate_methionine_one_carbon_metabolism	23	1.27	0.154
NCT vs R
ID	Set Size	NES	p.adjust
Nucleotide_biosynthesis	21	1.74	0.019
Serine_biosynthesis_pathway	14	-1.59	0.031
Glutathione_redox_balance	29	-1.41	0.079
Transsulfuration_pathway	12	-1.3	0.191
Folate_methionine_one_carbon_metabolism	23	-1.11	0.291
